P5238

### Rate, cause and costs of Heart Failure hospitalizations following ICD/CRT-D replacement: preliminary data from an Italian multicenter registry

V. Zaca<sup>1</sup>, M.L. Narducci<sup>2</sup>, Q. Parisi<sup>3</sup>, F. Quartieri<sup>4</sup>, F. Zanon<sup>5</sup>, M. Zoni Berisso<sup>6</sup>, D. Saporito<sup>7</sup>, P. Notarstefano<sup>8</sup>, G. Miracapillo<sup>9</sup>, C. Ferretti<sup>10</sup>, L. Calo<sup>11</sup>, A. Del Rosso<sup>12</sup>, V. Carinci<sup>13</sup>, M. Malacrida<sup>14</sup>, M. Biffi<sup>15</sup>

<sup>1</sup>Polyclinic Santa Maria alle Scotte, Siena, Italy; <sup>2</sup>Polyclinic Agostino Gemelli, Rome, Italy; <sup>3</sup>Centro di Ricerca e Formazione ad Alta Tecnologia nelle Scienze Biomediche - "Giovanni Paolo II", Campobasso, Italy; <sup>4</sup>Santa Maria Nuova Hospital, Reggio Emilia, Italy; <sup>5</sup>General Hospital of Rovigo, Rovigo, Italy; <sup>6</sup>Padre A Micone Hospital ASL3, Genoa-Sestri Ponente, Italy; <sup>7</sup>Infermi Hospital of Rimini, Rimini, Italy; <sup>8</sup>San Donato Hospital of Arezzo, Arezzo, Italy; <sup>9</sup>Misericordia Hospital, Grosseto, Italy; <sup>10</sup>Manerbio Hospital, Manerbio, Italy; <sup>11</sup>Polyclinic Casilino of Rome, Rome, Italy; <sup>12</sup>Ospedale San Giuseppe, Empoli, Italy; <sup>13</sup>Maggiore Hospital, Bologna, Italy; <sup>14</sup>Boston Scientific Italy, Milan, Italy; <sup>15</sup>University Hospital Policlinic S. Orsola-Malpighi, Bologna, Italy

**Funding Acknowledgement:** None

**Background:** Heart failure hospitalizations (HFHs) likely represent the main health care expenditure also in implantable cardiac defibrillators (ICDs) and cardiac resynchronization therapy defibrillators (CRT-D) recipients yet the event rate of HFH and the associated costs after device replacement or upgrade are unknown.

**Purpose:** To report HFH rates and associated costs within 12 months following ICD/CRT-D device replacement or upgrade procedure from ICD to CRT-D.

**Methods:** The DEtect long-term COmplications after icD rEplacement (DECODE) was a prospective, single-arm, multicenter cohort study exploring complications in ICD/CRT-D recipients undergoing device replacement or upgrade from ICD to CRT-D. All clinical and survival data of these patients at 12-month follow-up were prospectively analyzed. For each adjudicated HFH, the admission and discharge date were recorded, and ICD-9-CM diagnoses and procedure codes were obtained. The estimated reimbursement for each hospitalization was calculated according to the 2012 Italian national reimbursement rates.

**Results:** Between 2013 and 2015, 983 patients (mean age = 71 years, mean LVEF = 35%, NYHA class I/II = 75.6%) were enrolled: 900 (91.6%)

patients underwent device replacement (446 ICD/454 CRT-D) and 83 (8.4%) upgrade from ICD to CRT-D. After 12 months, 66 (6.7%) patients died, 40 (60.6%) for cardiovascular reasons. Fifty-five (5.6%) patients experienced at least 1 HFH. Overall, 91 HFH (9.6% event rate 95% CI, 7.7–11.7) occurred. Among the variables tested at univariate analysis, only LVEF  $\leq$ 35%, AF history and renal disease were confirmed as HFH predictors at multivariate analysis. HFH rate was significantly higher following upgrade procedures and occurrence of HFH was associated with an eleven-fold increased mortality risk (95% CI: 5.9 to 20.5;  $p < 0.0001$ ). The cumulative cost associated with HFHs incurred over the 12 months follow-up was 515305 €. The mean cost per HFH was 5662±9497 € [ranging from 3144 € to 64479 €] while the mean cost per patient with events was 9369±12687 €.

**Conclusion:** Underlying cardiac disease and renal failure are the main drivers of HFH and mortality, and of higher healthcare expenditures in ICD/CRT-D recipients following device replacement or upgrade. Accurate clinical assessment is needed to support the decision-maker at the time of ICD replacement to take an appropriate clinical and economic sustainable decision.
